# Supplementary material for: Discussing Out-of-Pocket Expenses During Clinical Appointments: An Observational Study of Patient-Psychiatrist Interactions
Source: Atypon-hosted journal article supplement (doi:10.1176/appi.ps.201600275), 2017-03-15
Supplement: appi.ps.201600275.ds001.pdf [file appi.ps.201600275.ds001.pdf]

**SUPPLEMENTAL TABLE 1. Examples of medications discussed among cost conversations<sup>a</sup>**

| <b>Class of Medications</b>                              | <b>Medications Discussed</b>                                                                                                                                                                                                                                                                                                                 |
|----------------------------------------------------------|----------------------------------------------------------------------------------------------------------------------------------------------------------------------------------------------------------------------------------------------------------------------------------------------------------------------------------------------|
| <b>Selective serotonin reuptake inhibitors</b>           | citalopram (Celexa), escitalopram (Lexapro), fluoxetine (Prozac), paroxetine (Paxil, Pexeva), sertraline (Zoloft)                                                                                                                                                                                                                            |
| <b>Serotonin-norepinephrine reuptake inhibitors</b>      | desvenlafaxine (Pristiq), duloxetine (Cymbalta), venlafaxine (Effexor)                                                                                                                                                                                                                                                                       |
| <b>Other anti-depressants</b>                            | bupropion (Wellbutrin, Aplenzin), desipramine (Norpramin), mirtazapine (Remeron), vilazodone (Viibryd)                                                                                                                                                                                                                                       |
| <b>Mood stabilizers</b>                                  | lithium (Lithobid, Eskalith), zonisamide (Zonegran [used as a mood stabilizer])                                                                                                                                                                                                                                                              |
| <b>Antipsychotics</b>                                    | aripiprazole (Abilify), iloperidone (Fanapt), lurasidone (Latuda), quetiapine (Seroquel), risperidone (Risperdal)                                                                                                                                                                                                                            |
| <b>Benzodiazepines, sleep aids and other anxiolytics</b> | alprazolam (Xanax), amitriptyline (Elavil [used as sleep aid]), buspirone (BuSpar), clonazepam (Klonopin), diazepam (Valium), estazolam (ProSom), eszopiclone (Lunesta), flurazepam (Dalmane), hydroxyzine (Atarax, Vistaril), melatonin, trazodone (Desyrel [used as sleep aid]), triazolam (Halcion), zolpidem (Ambien, Edular)            |
| <b>Stimulants and ADHD<sup>b</sup> medications</b>       | amphetamine salts (Adderall), armodafinil (Nuvigil), atomoxetine (Strattera), dexamethylphenidate (Focalin), lisdexamfetamine (Vyvanse), methylphenidate (Ritalin, Concerta), modafinil (Provigil)                                                                                                                                           |
| <b>Other psychotropics</b>                               | acamprosate (Campral), buprenorphine/naloxone (Suboxone), dextromethorphan/quinidine (Nuedexta), fluoxetine/olanzapine combination (Symbyax), l-methylfolate (Deplin), thyroid supplements as depression augmentation                                                                                                                        |
| <b>Non-psychotropics</b>                                 | adalimumab (Humira), esomeprazole (Nexium), hyoscyamine (Levsin), lansoprazole (Prevacid), leuprolide (Lupron), niacin (Niaspan, Niacor), nicotine patch (Nicoderm), omeprazole (Prilosec), sulphur skin gel (Prosacea); non-specific examples included anti-inflammatory patch, hepatitis C medications, multivitamins and pain medications |
| <b>Medications in general<sup>c</sup></b>                | <i>PT: And that's because I see that lady once a month who pays for my scripts.</i>                                                                                                                                                                                                                                                          |

<sup>a</sup>Medications discussed either by generic and/or brand name. Both generic and brand names are listed for ease of reference though often only one was used during the encounter. <sup>b</sup>ADHD = attention deficit hyperactivity disorder.

<sup>c</sup>Medications in general represents cost conversations discussing medication costs without naming a specific medication and without naming a general type of medication like the non-specific examples in Non-psychotropics.
